# Supplementary material
Source: HighWire-hosted journal article supplement (https://www.cmajopen.ca/highwire/filestream/84451/field_highwire_adjunct_files/1/2020-0007-original-submission.pdf)
Supplement: 2020-0007-original-submission.pdf [file 2020-0007-original-submission.pdf]

# **The burden of young-adult onset metabolic syndrome in a Northern Alberta primary care setting using electronic medical record data**

Jamie J. Boisvenue MSc<sup>1\*</sup>, Carlo U. Oliva BSc<sup>2</sup>, Donna P. Manca MD<sup>3</sup>,  
Jeffrey A. Johnson PhD<sup>1</sup>, Roseanne O. Yeung MD<sup>1,4</sup>

*Boisvenue et al. –Metabolic Syndrome*

<sup>1</sup>School of Public Health, University of Alberta, Edmonton, Alberta, Canada;

<sup>2</sup>Department of Computing Science, Faculty of Science, University of Alberta, Edmonton, Canada;

<sup>3</sup>Department of Family Medicine, Faculty of Medicine & Dentistry, University of Alberta, Edmonton, Alberta, Canada; Northern Alberta Primary Care Research Network, Edmonton, Alberta, Canada;

<sup>4</sup>Division of Endocrinology & Metabolism, Department of Medicine, Faculty of Medicine & Dentistry, University of Alberta, Edmonton, AB, Canada.

\*Correspondence to  
Jamie Boisvenue MSc  
Office: 780-886-8745  
Fax: 780-492-6444  
Email: boisvenu@uaberta.ca  
School of Public Health, University of Alberta  
9-111 Clinical Sciences Building  
Edmonton, Alberta, Canada  
T6G 2G3

Word Count: 2396

Tables: 2

Figures: 4

Disclaimer: JJB received studentship funding from the Alberta Diabetes Institute for the duration of this project. ROY reports grants from Astra Zeneca, personal fees from Merck, personal fees from Novo Nordisk, personal fees from Sanofi, outside the submitted work. CUO, DPM, and JAJ have no disclosures.

1  
2  
3  
4  
5  
6  
7  
8  
9  
10  
11  
12  
13  
14  
15  
16  
17  
18  
19  
20  
21  
22  
23  
24  
25  
26  
27  
28  
29  
30  
31  
32  
33  
34  
35  
36  
37  
38  
39  
40  
41  
42  
43  
44  
45  
46  
47  
48  
49  
50  
51  
52  
53  
54  
55  
56  
57  
58  
59  
60

Support: The authors acknowledge the support of the Northern Alberta Primary Care Research Network, Mr. Brian Forst, Mrs. Allison Boileau, and Mrs. Kimberly Derksen for their assistance with data access. JJB received studentship funding from the Alberta Diabetes Institute for the duration of this project.

Confidential

## Abstract

**Background:** The prevalence of metabolic syndrome (MetS) is growing worldwide, yet remains under-investigated in the Canadian adult primary care practice population. Given the preventable end-organ complications associated with MetS, we sought to describe the prevalence and metabolic burden of MetS in younger adults 18-40 years old.

**Methods:** Using electronic medical record data from the Northern Alberta Primary Care Research Network (NAPCReN), we developed a case definition and case-finding algorithm for the identification of MetS and performed cross sectional analysis on physical exam, laboratory, and validated electronic medical record derived disease diagnosis.

**Results:** In our sample of 15,766 young adults, the prevalence of MetS in this sample of young adults was 4.4%. The most frequent 3-factor combination (41.4%) of MetS consisted of being overweight/ obese, having elevated blood pressure (BP), and hypertriglyceridemia. Half of MetS cases (50.9%) were missing measures for fasting blood glucose and one-fifth were missing an HbA1c. Young adults with MetS showed a prevalence of diabetes (15.2%) and hypertension (14.2%). Notably, most young adults with a body mass index (BMI)  $\geq 25\text{kg/m}^2$  were missing A1c (66.9%), fasting blood glucose (84.0%), and lipid testing (79.0%).

**Interpretation:** The proportions of missing data among young adults likely underestimates the true prevalence of MetS in this young adult sample. Further investigation is required to validate the case definition and determine whether appropriate intervention is being taken to identify young adults at higher risk of metabolic disease.

**Introduction**

Metabolic syndrome (MetS) is a constellation of interconnected metabolic factors that contribute to the development of obesity, cardiovascular disease (CVD), type 2 diabetes (T2D) and other related chronic conditions [1–3]. The main components of MetS are widely considered to be elevated blood pressure (BP), low high-density lipoprotein cholesterol (HDL-C), hypertriglyceridemia, dysglycemia, and excess visceral adiposity [4]. The pathogenic mechanisms of MetS are thought to be driven by the presence of chronic low-grade inflammation associated with the development of insulin resistance and excess adiposity [5]. The causes of MetS are still under investigation and reviews have been published elsewhere [4,6,7].

Since MetS is typically more prevalent in older populations, its characterization in younger adult populations is less studied. Recently, there has been little investigation of the prevalence of young-adult onset MetS in Canada. Existing reports are either based on smaller cohorts of older adults, minority ethnic groups, or overall population estimates based on self-reported data [8–10]. Two Canadian based studies both using cycle 1 Canadian Health Measures Survey (CHMS) data from 2007-2009 showed population prevalence estimates for young-adult onset MetS 18-40 years to be 6.5% and 7.8%, respectively [8,11].

Challenges in consistently reporting estimates of MetS prevalence are driven by the ambiguity of multiple case definitions created by different organizations [1,12–16]. The most widely used criteria for identifying individuals with MetS were published in the US National Cholesterol Education Program Adult Treatment Panel III (NCEP- ATP III) guidelines [12]. Moreover, the use of multiple definitions has created confusion for clinicians tasked with identifying MetS with no clear actionable guidelines. The main objectives of this study were to report on the prevalence of young-adult onset MetS in Northern Albertan young-adult patients 18-40 years of

age using a harmonized case definition for use within the Northern Alberta Primary Care Research Network (NAPCReN) primary care electronic medical record (EMR) data.

## Methods

### *Data Source*

We used Alberta-based data collected from NAPCReN, which contributes data to the Canadian Primary Care Sentinel Surveillance Network (CPCSSN) [17]. The data provided for this research is the NAPCReN regional data, a Northern Alberta subset of the Alberta primary care practice population. The EMR data is representative of 18 active clinics consisting of 77 participating primary care clinicians across Northern Alberta representing 91,525 patients[18]. Consenting family physicians and primary care clinicians provide NAPCReN with access to their EMR data. We analyzed patient demographic, physical examination, laboratory investigation, and CPCSSN defined diagnosis of disease data. Physical exam data included body mass index (BMI), systolic blood pressure (sBP), and diastolic blood pressure (dBP). The laboratory data included high-density lipoprotein cholesterol (HDL-C), hemoglobin A1c (HbA1c), fasting blood glucose (FBG), and triglycerides (TG).

### *Study Design*

This was a cross-sectional study evaluating the most recent measures of BMI, BP, laboratory investigations, and disease diagnosis data to ascertain the prevalence of MetS in a sample of primary care practices. The population denominator included all alive persons between the ages of 18 to 40 years who had an encounter with a participating NAPCReN primary care clinic between June 29, 2015 and June 29, 2018. In establishing the denominator, study subjects must have had at least one measure between the specified date range and were excluded if they were outside of this range, were missing sex data, had a non-Albertan postal code, or were

1  
2  
3  
4  
5  
6  
7  
8  
9  
10  
11  
12  
13  
14  
15  
16  
17  
18  
19  
20  
21  
22  
23  
24  
25  
26  
27  
28  
29  
30  
31  
32  
33  
34  
35  
36  
37  
38  
39  
40  
41  
42  
43  
44  
45  
46  
47  
48  
49  
50  
51  
52  
53  
54  
55  
56  
57  
58  
59  
60

deceased (Figure 1.1). This study was approved by the Health Research Ethics Board, University of Alberta (Pro. 00073600).

**Measures**

We developed a harmonized case definition using criteria based on the National Cholesterol Education Program Adult Treatment Panel III [12], the World Health Organization (WHO)[19], Diabetes Canada [15], Canadian-Cardiovascular Harmonized National Guidelines Endeavour (C-CHANGE)[20], and CPCSSN validated disease definitions [21]. As outlined in Table 1.2, a patient was classified as having MetS if they met a minimum of three of five criteria. We used BMI given that 98.5% individuals within this data did not have measures for waist circumference (WC) and there is reasonable evidence to consider BMI where WC data is unavailable [22]. We used a BMI value of  $\geq 25 \text{ kg/m}^2$  and did not distinguish between those in overweight or obese categories [12]. Outliers were removed using cut points  $< 15 \text{ kg/m}^2$  and  $> 55 \text{ kg/m}^2$  based on clinical judgement.

Dysglycemia was present if a subject had a CPCSSN diagnosis of diabetes [21] or HbA1c  $\geq 6.0\%$  or FBG  $\geq 5.6 \text{ mmol/L}$ . A diagnosis of diabetes was identified through an ICD9 250 code in the billing or problem list, anti-diabetic medications, or a previous laboratory value of elevated HbA1c or FBG.

We used the validated CPCSSN diagnosis of hypertension [21] or an office sBP or dBP to establish the presence of elevated BP. Based on clinical judgement, we removed outliers for office BP that were outside the range of 60-300 mmHg for sBP and 30-200 mmHg for dBP. A diagnosis of hypertension was made from medical billing, medications, and the problem list to identify hypertension related ICD9 codes (Table A-1.2).

To assess the presence of dyslipidemia, women were identified as having low HDL-C at  $<1.3$  mmol/L and men at  $<1.0$  mmol/L. Hypertriglyceridemia was determined using a TG cut point of  $\geq 1.7$  mmol/L. Notably, our data did not distinguish whether TG was fasting or random, but there is evidence that the use of non-fasting TG is acceptable for the purposes of identifying MetS [23].

### ***MetS Case-finding Algorithm***

A linear search algorithm was developed to ascertain prevalent cases of MetS in subjects who met a minimum of three of the five criteria listed in Table 1.1. The process of identifying MetS cases in the algorithm (Figure 2.1) begins with the first of ten possible combinations. Each eligible patient within the sample is assessed for each combination. If a patient met the criteria for three factors for a given combination, they were identified as having MetS. It is important to note that it is possible for a patient to have MetS based on more than one combination, and that a patient is counted only once in establishing the prevalence, regardless of the number of combinations met.

### ***Statistical Analysis***

Statistical analysis was conducted using RStudio version 1.1.453, RStudio Inc., under Affero General Public License for data manipulation, univariate and bivariate analysis, and linear search algorithm development. The analysis was restricted to subjects who met at least three of the five MetS criteria. The variables studied included age (calculated from year of birth), sex, disease status, BMI, BP, FBG, HbA1c, HDL, and TG measures. Continuous variables were reported as mean  $\pm$  standard deviation (SD). Categorical variables were expressed as counts with proportions. The prevalence of MetS was defined as the ratio between those having MetS and the total number of subjects included in the denominator.

1  
2  
3  
4  
5  
6  
7  
8  
9  
10  
11  
12  
13  
14  
15  
16  
17  
18  
19  
20  
21  
22  
23  
24  
25  
26  
27  
28  
29  
30  
31  
32  
33  
34  
35  
36  
37  
38  
39  
40  
41  
42  
43  
44  
45  
46  
47  
48  
49  
50  
51  
52  
53  
54  
55  
56  
57  
58  
59  
60

**Results**

There were 22,765 patients available for analysis within this study between June 29, 2015 and June 29, 2018. After exclusion criteria were applied, a total of 15,766 individual patient records were evaluated for the presence of MetS (Figure 1.1). Using our linear search algorithm, we identified 695 participants with MetS, corresponding to a prevalence of 4.4%. The most common 3-factor MetS syndrome representing 41.1% included measures of BMI, elevated BP, and hypertriglyceridemia.

Those with MetS had a higher mean BMI than those in the non-MetS group ( $35.13 \pm 7.00 \text{ kg/m}^2$  vs.  $27.26 \pm 6.19 \text{ kg/m}^2$ ), though it is notable that the mean BMI in the non-MetS group was within the overweight range. Those with MetS had higher measures of dysglycemia (FBG  $5.74 \pm 1.68 \text{ mmol/L}$  vs.  $4.95 \pm 1.11 \text{ mmol/L}$ ; HbA1c  $5.94 \pm 1.36\%$  vs.  $5.33 \pm 0.70\%$ ) than those without MetS. Triglycerides were twice as high in the MetS group compared to those without MetS ( $2.39 \pm 1.18 \text{ mmol/L}$  vs.  $1.28 \pm 0.77 \text{ mmol/L}$ ). The average HDL-C was lower in the MetS group (mean  $1.09 \pm 0.24 \text{ mmol/L}$  vs.  $1.44 \pm 0.36 \text{ mmol/L}$ ) (Table 1.2).

Among physical exam measures, 91.2% of individuals in the MetS group had a BMI of  $\geq 25 \text{ kg/m}^2$  (Figure 1.3) and 75.1% had elevated office sBP and dBP. Dyslipidemia was more prominent in the MetS group compared to the non-MetS group with a greater presence of hypertriglyceridemia (70.6% vs. 2.2%) and low HDL-C (59.1% vs. 2.3%). Of MetS individuals, 38.7% had dysglycemia. Depression represented the most prevalent comorbidity in the MetS group (16.5%) and the non-MetS group (13.5%). Diabetes was higher in the MetS group (15.2%) compared to the non-MetS group (1.7%), and hypertension was more prevalent among MetS individuals compared to the non-MetS group (14.2% vs. 0.8%). Though absolute values

were small, 2.5% of the MetS group had a CPCSSN diagnosis of osteoarthritis compared to 1.0% in the non-MetS group (Figure 1.3).

### **Missing Data**

In those with MetS, half (50.9%) were missing an FBG measurement and a fifth (21.9%) were missing measurements for HbA1c. Regarding measures of dyslipidemia and hypertriglyceridemia, 13.2% were missing laboratory investigations for HDL-C and 9.6% were missing TG. Physical examination data were measured more frequently in this group as only 7.2% were missing BMI and 3.2% were missing an office BP reading (Figure 1.4 A).

Within the overall sample of young adults 18-40 years old, 25.5% were missing a BMI.

Moreover, among those who were missing a BMI measure, 65.0% met two factors for MetS and therefore would have been considered as having MetS if they had a BMI over the 25 kg/m<sup>2</sup> cut point.

Notably, among all with a recorded BMI  $\geq 25$  kg/m<sup>2</sup> (n=7133), the vast majority were missing measures for FBG (84.0%), HDL-C (80.4%), TG (79.0%), and HbA1c (66.9%) (Figure 1.4 B).

### **Discussion**

We established an EMR case definition and case-finding algorithm for MetS within the age group of 18-40 years and found a prevalence of 4.4% of younger onset MetS in Northern Alberta primary care EMR data. Importantly, we found a large proportion of missing data in this younger adult sample and therefore suspect that our findings underestimate the true prevalence of MetS. Regardless, it is difficult to know how missing data would potentially bias the true clinical prevalence given that those who have a physical exam or laboratory investigation were likely measured under clinical suspicion and therefore may represent an enriched sample [24].

1  
2  
3  
4  
5  
6  
7  
8  
9  
10  
11  
12  
13  
14  
15  
16  
17  
18  
19  
20  
21  
22  
23  
24  
25  
26  
27  
28  
29  
30  
31  
32  
33  
34  
35  
36  
37  
38  
39  
40  
41  
42  
43  
44  
45  
46  
47  
48  
49  
50  
51  
52  
53  
54  
55  
56  
57  
58  
59  
60

One of our key findings indicate that the patterns within young-adult onset MetS were similar compared to other studies looking at older populations [10,25]. Although there may be an age-dependent increase in the prevalence of MetS, the distribution of MetS features remains relatively the same, despite previous evidence of the physiological differences in MetS by age [26].

Canadian epidemiological investigations vary greatly in prevalence estimates for MetS between 2% and 13% in most studies with the most reliable estimates being 6.5% and 7.8% based on CHMS data [8,11]. These findings reinforce the likelihood that our data underestimate the true prevalence of MetS in the primary care setting, particularly given that the prevalence of obesity has not reduced since those studies were carried out [27], and that the metabolic health of those seeking primary care are possibly worse than the population not seeking any medical care [24,28].

Our data might suggest that the lack of clinical investigation for risk markers in younger adults with MetS or over elevated BMI, represents a lost opportunity for chronic disease prevention. This lack of investigation likely represents a combination of both patient and clinical inertia where patients may be less inclined to obtain lab testing while young and asymptomatic, and physicians might be less likely to order laboratory tests for the same reasons. There may also be reluctance to place the MetS label on a patient, as this could potentially cause distress or influence the ability for an individual to obtain health insurance. There may also be considerable resource restraints given that 45.2% of young adults in this practice population had a BMI in the overweight/obese category. Physicians also report difficulties addressing MetS among multiple definitions and recognize that identification of individual clinical risk factors is insufficient to appropriately address MetS [29]. Lastly, the causes of MetS often involve broad social

challenges requiring significant resources that may lie outside the scope of conventional medicine or pose a challenge due to other conflicting clinical priorities in a patients care [30,31].

The NAPCReN data are point-of-care EMR data allowing for a pragmatic understanding of the patterns of disease and the diagnostic gaps in the primary care setting. Using validated CPCSSN definitions for hypertension and diabetes in the case-finding for MetS strengthens this study beyond the conventional measures for elevated BP and dysglycemia. Our harmonized case-finding algorithm for MetS will further assist the CPCSSN network in establishing and validating a case definition for use in future surveillance, research, and quality improvement projects. A major limitation of real-world data is that of insufficient clinical documentation and imperfect EMR data. In many instances, fields are missing information, incorrectly entered into the EMR, and patient demographics such as home address and death are not always reported if they moved out of province [32]. We recognize that recording complete health information requires sufficient clinical reasoning and manpower and that measurements are affected by factors such as clinic workflow, professional judgment, recording behaviours of the provider, monetary incentives, and design of the EMR. Moreover, negative findings are less likely to be reported, resulting in a selective non-reporting bias [33]. These limitations should be carefully considered in the interpreting this study.

## Conclusion

This cross-sectional study of real-world family practice data suggests that one out of every twenty-five persons between 18-40 years of age has MetS. However, this is likely underestimated due to large proportions of missing data, driven by the sub-clinical nature of MetS, the high prevalence of overweight and obese patients, and the competing priorities of both patients and physicians. Further work is required to validate this case definition, and better understand whether missing data is clinically informed, rather than an omission due to lack of

1  
2  
3  
4  
5  
6  
7  
8  
9  
10  
11  
12  
13  
14  
15  
16  
17  
18  
19  
20  
21  
22  
23  
24  
25  
26  
27  
28  
29  
30  
31  
32  
33  
34  
35  
36  
37  
38  
39  
40  
41  
42  
43  
44  
45  
46  
47  
48  
49  
50  
51  
52  
53  
54  
55  
56  
57  
58  
59  
60

time or resources. These observations provide a basis for engaging primary care clinicians in considering the current recommendations for screening of young-adults at higher risk of metabolic disease, and actions to earlier detection and management of MetS and its associated morbidity.

Confidential

## References

1. Grundy SM, Cleeman JI, Daniels SR, Donato KA, Eckel RH, Franklin BA, et al. Diagnosis and management of the metabolic syndrome: an American Heart Association/National Heart, Lung, and Blood Institute Scientific Statement. *Circulation* [Internet]. 2005 [accessed 2019 May 10];112(17):2735–52. Available from: <http://www.ncbi.nlm.nih.gov/pubmed/16157765>
2. Grundy SM. Metabolic syndrome pandemic. *Arterioscler Thromb Vasc Biol* [Internet]. 2008 [accessed 2019 Apr 15];28(4):629–36. Available from: <https://www.ncbi.nlm.nih.gov/pubmed/18174459>
3. DeFronzo RA, Ferrannini E. Insulin resistance. A multifaceted syndrome responsible for NIDDM, obesity, hypertension, dyslipidemia, and atherosclerotic cardiovascular disease. *Diabetes Care* [Internet]. 1991 Mar 1 [accessed 2019 Apr 10];14(3):173–94. Available from: <http://www.ncbi.nlm.nih.gov/pubmed/2044434>
4. Kassi E, Pervanidou P, Kaltsas G, Chrousos G. Metabolic syndrome: definitions and controversies. *BMC Med* [Internet]. 2011 [accessed 2019 Apr 15];9(48). Available from: <https://www.ncbi.nlm.nih.gov/pubmed/21542944>
5. Hotamisligil GS. Inflammation, metaflammation and immunometabolic disorders. *Nature* [Internet]. 2017 [accessed 2019 Apr 10];542:177–85. Available from: <https://www.mendeley.com/catalogue/inflammation-metaflammation-immunometabolic-disorders-1/>
6. Srikanthan K, Feyh A, Visweshwar H, Shapiro JI, Sodhi K. Systematic review of metabolic syndrome biomarkers: A panel for early detection, management, and risk stratification in the West Virginian population. *Int J Med Sci* [Internet]. 2016 [accessed 2019 Apr 12];13(1):25–38. Available from: <http://www.medsci.org/v13p0025.pdf>
7. Deepa M, Farooq S, Datta M, Deepa R, Mohan V. Prevalence of metabolic syndrome using WHO, ATPIII and IDF definitions in Asian Indians: The Chennai Urban Rural Epidemiology Study (CURES-34). *Diabetes Care* [Internet]. 2007 Apr 1 [accessed 2019 Mar 22];30(1):127–34. Available from: <https://hearttruth.gov/health/public/heart/obesity/wecan/portion/documents/CORESET1.pdf>
8. Setayeshgar S, Whiting SJ, Vatanparast H. Metabolic Syndrome in Canadian Adults and Adolescents: Prevalence and Associated Dietary Intake. *ISRN Obes* [Internet]. 2012 [accessed 2019 Apr 11];2012:1–8. Available from: <https://www.hindawi.com/journals/isrn/2012/816846/>
9. Fall CHD, Kumaran K. Metabolic programming in early life in humans. *Philosophical Trans R Soc B* [Internet]. 2019 [accessed 2019 Apr 12];374(20180123):1–9. Available from: <http://care.diabetesjournals.org/content/diacare/31/12/2349.full.pdf>
10. Van Den Hooven C, Ploemacher J, Godwin M. Metabolic syndrome in a family practice population: Prevalence and clinical characteristics. *Can Fam Physician*

[Internet]. 2006 [accessed 2019 Apr 16];52(8):982–3. Available from: <https://www.cfp.ca/content/52/8/982>

11. Riediger ND, Clara I. Prevalence of metabolic syndrome in the Canadian adult population. *Cmaj* [Internet]. 2011 [accessed 2019 May 14];183(15):1127–34. Available from: <http://www.cmaj.ca/content/183/15/E1127>
12. National Institute of Health. ATP III Guidelines At-A-Glance Quick Desk Reference. [NCEP] Natl Cholest Educ Progr ATP III [Internet]. 2001 [accessed 2019 Apr 14];329(3):925–9. Available from: <https://www.nhlbi.nih.gov/files/docs/guidelines/atglance.pdf>
13. International Diabetes Federation. The IDF consensus worldwide definition of the metabolic syndrome [Internet]. 2006 [accessed 2019 Apr 14]. Available from: <https://www.idf.org/e-library/consensus-statements/60-idfconsensus-worldwide-definitionof-the-metabolic-syndrome.html>
14. World Health Organization (WHO). Definition, diagnosis and classification of diabetes mellitus and its complications. Report of a WHO consultation. [Internet]. 1999 [accessed 2019 Apr 10]. Available from: [https://apps.who.int/iris/bitstream/handle/10665/66040/WHO\\_NCD\\_NCS\\_99.2.pdf;jsessionid=EB0B661B749D1131FB7708A2BC3395B6?sequence=1](https://apps.who.int/iris/bitstream/handle/10665/66040/WHO_NCD_NCS_99.2.pdf;jsessionid=EB0B661B749D1131FB7708A2BC3395B6?sequence=1)
15. Punthakee Z, Goldenberg R, Katz P. Definition, Classification and Diagnosis of Diabetes, Prediabetes and Metabolic Syndrome. *Can J Diabetes* [Internet]. 2018 [accessed 2019 Apr 12];42:S10–5. Available from: [https://www.canadianjournalofdiabetes.com/article/S1499-2671\(17\)30813-4/fulltext](https://www.canadianjournalofdiabetes.com/article/S1499-2671(17)30813-4/fulltext)
16. Balkau B, Charles MA. Comment on the provisional report from the WHO consultation. European Group for the Study of Insulin Resistance (EGIR). *Diabet Med* [Internet]. 1999 May [accessed 2019 Apr 15];16(5):442–3. Available from: <http://www.ncbi.nlm.nih.gov/pubmed/10342346>
17. CPCSSN. Canadian Primary Care Sentinel Surveillance Network [Internet]. [accessed 2019 Apr 10]. Available from: <http://cpcssn.ca/>
18. Northern Alberta Primary Care Research Network (NAPCRen) [Internet]. 2019 [accessed 2019 Jul 1]. Available from: <http://napcren.ca/>
19. World Health Organization. Body Mass Index Guidelines. 2019 Apr 12 [accessed 2019 Apr 12]; Available from: <http://www.euro.who.int/en/health-topics/disease-prevention/nutrition/a-healthy-lifestyle/body-mass-index-bmi>
20. Tobe SW, Stone JA, Todd Anderson, Bacon S, Cheng AYY, Daskalopoulou SS, et al. Canadian Cardiovascular Harmonized National Guidelines Endeavour (C-CHANGE) guideline for the prevention and management of cardiovascular disease in primary care: 2018 update. *Can Med Assoc J* [Internet]. 2018 [accessed 2019 Apr 12];190(40):E1192–206. Available from: <http://www.cmaj.ca/content/190/40/E1192>
21. Williamson T, Green ME, Birtwhistle R, Khan S, Garies S, Wong ST, et al. Validating the 8 CPCSSN case definitions for chronic disease surveillance in a

- primary care database of electronic health records. *Ann Fam Med* [Internet]. 2014 [accessed 2019 Apr 10];12(4):367–72. Available from: <https://www.ncbi.nlm.nih.gov/pubmed/25024246>
22. Salete De Barros S, Mastroeni S, Mastroeni MF, Ekwaru JP, Setayeshgar S, Veugeliers PJ, et al. Anthropometric measurements as a potential non-invasive alternative for the diagnosis of metabolic syndrome in adolescents. *Arch Endocrinol Metab* [Internet]. 2019 [accessed 2019 Apr 9];63(1):30–9. Available from: <http://www.scielo.br/pdf/aem/v63n1/2359-4292-aem-63-01-0030.pdf>
  23. Driver SL, Martin SS, Gluckman TJ, Clary JM, Blumenthal RS, Stone NJ. Fasting or Nonfasting Lipid Measurements It Depends on the Question. *J Am Coll Cardiol* [Internet]. 2016 [accessed 2019 Mar 23];67(10):1227–34. Available from: <http://dx.doi.org/10.1016/j.jacc.2015.12.047>
  24. Rigobon A V., Birtwhistle R, Khan S, Barber D, Biro S, Morkem R, et al. Adult obesity prevalence in primary care users: An exploration using Canadian Primary Care Sentinel Surveillance Network (CPCSSN) data. *Can J Public Heal* [Internet]. 2015 [accessed 2019 Apr 10];106(5):e283–9. Available from: <https://www.ncbi.nlm.nih.gov/pubmed/26451989>
  25. Ford ES, Giles WH, Dietz WH. Prevalence of the Metabolic Syndrome Among US Adults. *Am Med Assoc* [Internet]. 2002 [accessed 2019 Apr 11];287(3):356–9. Available from: <https://www.ncbi.nlm.nih.gov/pubmed/11790215>
  26. Sumner AD, Sardi GL, Reed JF. Components of the Metabolic Syndrome Differ Between Young and Old Adults in the US Population. *J Clin Hypertens* [Internet]. 2012 [accessed 2019 Apr 23];14(8):502–6. Available from: <https://www.ncbi.nlm.nih.gov/pubmed/22863157>
  27. Health Quality Council of Alberta. Overweight and Obesity in Adult Albertans: A Role for Primary Healthcare Promoting and improving patient safety and health service quality across Alberta [Internet]. Calgary, Alberta; 2015 [accessed 2019 Apr 18]. Available from: [http://hqca.ca/wp-content/uploads/2018/05/HQCA\\_Obesity\\_Report\\_FINAL\\_RELEASE.pdf](http://hqca.ca/wp-content/uploads/2018/05/HQCA_Obesity_Report_FINAL_RELEASE.pdf)
  28. Madigan CD, Elmitt N, Douglas K, Klein D, Sturgiss E. Metabolic syndrome and weight management programs in primary care: a comparison of three international healthcare systems. *Aust J Prim Health* [Internet]. 2018 [accessed 2019 Apr 10];24:372–7. Available from: <https://www.publish.csiro.au/py/pdf/PY18021>
  29. Campbell-Scherer D, Sharma AM. Improving Obesity Prevention and Management in Primary Care in Canada. *Curr Obes Rep* [Internet]. 2016 [accessed 2019 May 7];5(3):327–32. Available from: <http://dx.doi.org/10.1007/s13679-016-0222-y>
  30. Berger E, Castagné R, Chadeau-Hyam M, Bochud M, D'Errico A, Gandini M, et al. Multi-cohort study identifies social determinants of systemic inflammation over the life course. *Nat Commun* [Internet]. 2019 [accessed 2019 May 28];10(1):1–10. Available from: <http://dx.doi.org/10.1038/s41467-019-08732-x>

31. Ma Z, Li D, Zhan S, Sun F, Xu C, Wang Y, et al. Analysis of risk factors of metabolic syndrome using a structural equation model: a cohort study. *Endocrine* [Internet]. 2019 [accessed 2019 May 28];63(1):52–61. Available from: <http://dx.doi.org/10.1007/s12020-018-1718-x>

32. Garies S, Birtwhistle R, Drummond N, Queenan J, Williamson T. Data Resource Profile: National electronic medical record data from the Canadian Primary Care Sentinel Surveillance Network (CPCSSN). *Int J Epidemiol* [Internet]. 2017 [accessed 2019 May 28];46(4):1091-1092f. Available from: <https://academic.oup.com/ije/article/46/4/1091/3058732>

33. Phelan M, Bhavsar N, Goldstein BA. Illustrating Informed Presence Bias in Electronic Health Records Data: How Patient Interactions with a Health System Can Impact Inference. *eGEMs (Generating Evid Methods to Improv patient outcomes)* [Internet]. 2017 [accessed 2019 May 1];5(1):1–14. Available from: <https://www.ncbi.nlm.nih.gov/pubmed/29930963>

Confidential

**Table 1.1** Harmonized criteria for defining metabolic syndrome:  $\geq 3$  factors to make a diagnosis

| Metabolic Syndrome Criteria  | Cut Point                                                                                                  |
|------------------------------|------------------------------------------------------------------------------------------------------------|
| Overweight and Obese         | BMI $\geq 25$ kg/m <sup>2</sup>                                                                            |
| Elevated Blood Pressure (BP) | CPCSSN diagnosis of hypertension<br>or<br>systolic BP $\geq 130$ mmHg<br>or<br>diastolic BP $\geq 85$ mmHg |
| Dysglycemia                  | CPCSSN diagnosis of diabetes<br>or<br>HbA1c $\geq 6.0\%$<br>or<br>FBG $\geq 5.6$ mmol/L                    |
| Hypertriglyceridemia         | TG $\geq 1.7$ mmol/L                                                                                       |
| Low HDL-C                    | HDL-C $< 1.0$ mmol/L in men, $< 1.3$ mmol/L in women                                                       |

\*BMI cut points for outliers at  $< 15$  kg/m<sup>2</sup> and  $\geq 50$  kg/m<sup>2</sup>, if BMI is  $\geq 30$  kg/m<sup>2</sup>, central obesity can be assumed. Body Mass Index (BMI), blood pressure (BP), glycated hemoglobin (HbA1c), fasting blood glucose (FBG), high density lipoprotein cholesterol (HDL-C), triglycerides (TG). Cut points are based on previously establish formal criteria for MetS, BMI [19], elevated BP, HbA1c, and FBG [15], HDL-C and TG[12,20], CPCSSN disease diagnosis[35].

1  
2  
3  
4  
5  
6  
7  
8  
9  
10  
11  
12  
13  
14  
15  
16  
17  
18  
19  
20  
21  
22  
23  
24  
25  
26  
27  
28  
29  
30  
31  
32  
33  
34  
35  
36  
37  
38  
39  
40  
41  
42  
43  
44  
45  
46  
47

**Table 1.2** Baseline characteristics of study sample stratified by metabolic syndrome

| Characteristic            | MetS (n=695) |         |               | No MetS (n=15071) |         |               |
|---------------------------|--------------|---------|---------------|-------------------|---------|---------------|
|                           | N            | (%)     | Mean ±SD      | N                 | (%)     | Mean ±SD      |
| Age (years)               | 695          | (100.0) | 34.29 ±4.84   | 15071             | (100.0) | 30.78 ±5.89   |
| Sex (female, %)           | 342          | (49.2)  | -             | 9660              | (64.1)  | -             |
| BMI (kg/m <sup>2</sup> )  | 645          | (92.8)  | 35.13 ±7.00   | 11111             | (73.7)  | 27.26 ±6.19   |
| Systolic BP (mmHg)        | 673          | (96.8)  | 130.04 ±13.37 | 13512             | (89.7)  | 118.66 ±12.75 |
| Diastolic BP (mmHg)       | 673          | (96.8)  | 84.15 ±9.31   | 13512             | (89.7)  | 75.48 ±9.73   |
| FBG (mmol/L)              | 341          | (49.1)  | 5.74 ±1.68    | 1666              | (11.1)  | 4.95 ±1.11    |
| HbA1c (%)                 | 543          | (78.1)  | 5.94 ±1.36    | 3303              | (21.9)  | 5.33 ±0.70    |
| TG (mmol/L; median [IQR]) | 628          | (90.4)  | 2.39 ±1.18    | 1940              | (12.9)  | 1.28 ±0.77    |
| HDL-C (mmol/L)            | 603          | (86.8)  | 1.09 ±0.24    | 1800              | (11.9)  | 1.44 ±0.36    |

Physical exam and laboratory investigation measures are shown with counts, proportions, and mean ±SD/ median ±IQR and stratified by MetS. \*Metabolic syndrome (MetS), body mass index (BMI), blood pressure (BP), fasting blood glucose (FBG), glycated hemoglobin (HbA1c), triglycerides (TG), high density lipoprotein cholesterol (HDL-C).

**Figure 1.1** Flow of data extraction and cleaning from the NAPCReN-CPCSSN data repository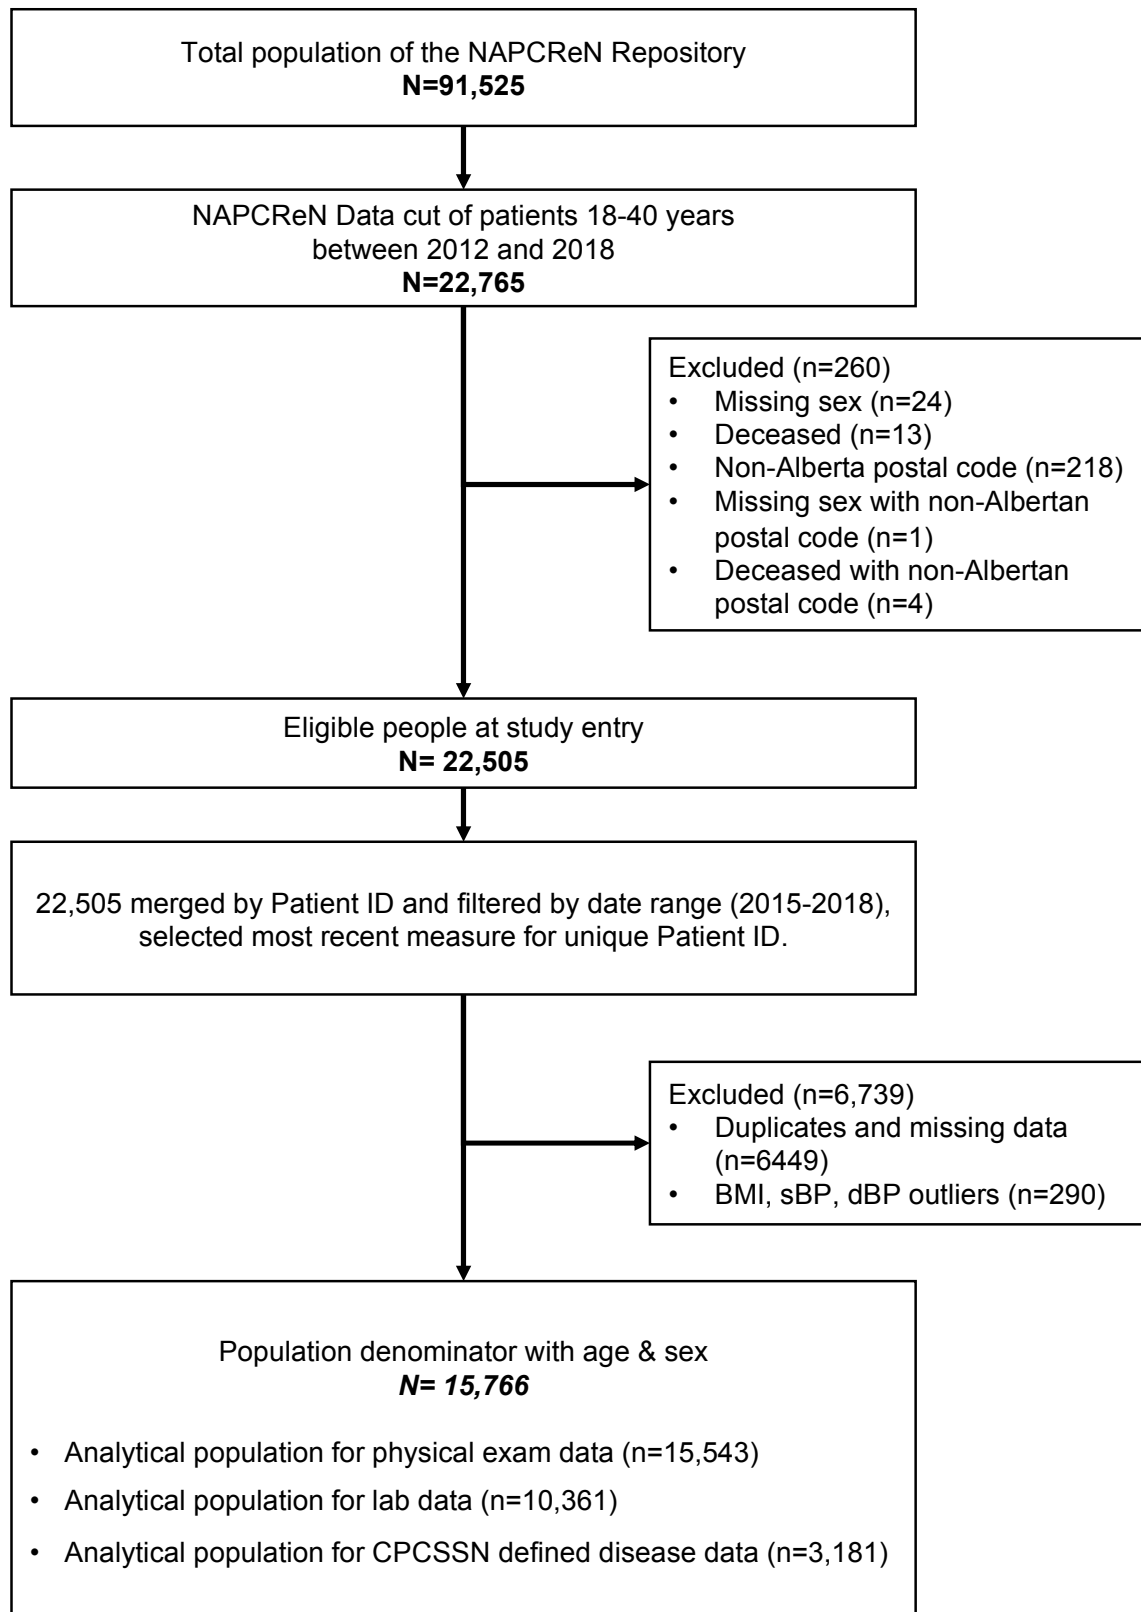

**Figure 1.2** Metabolic syndrome case-finding algorithm

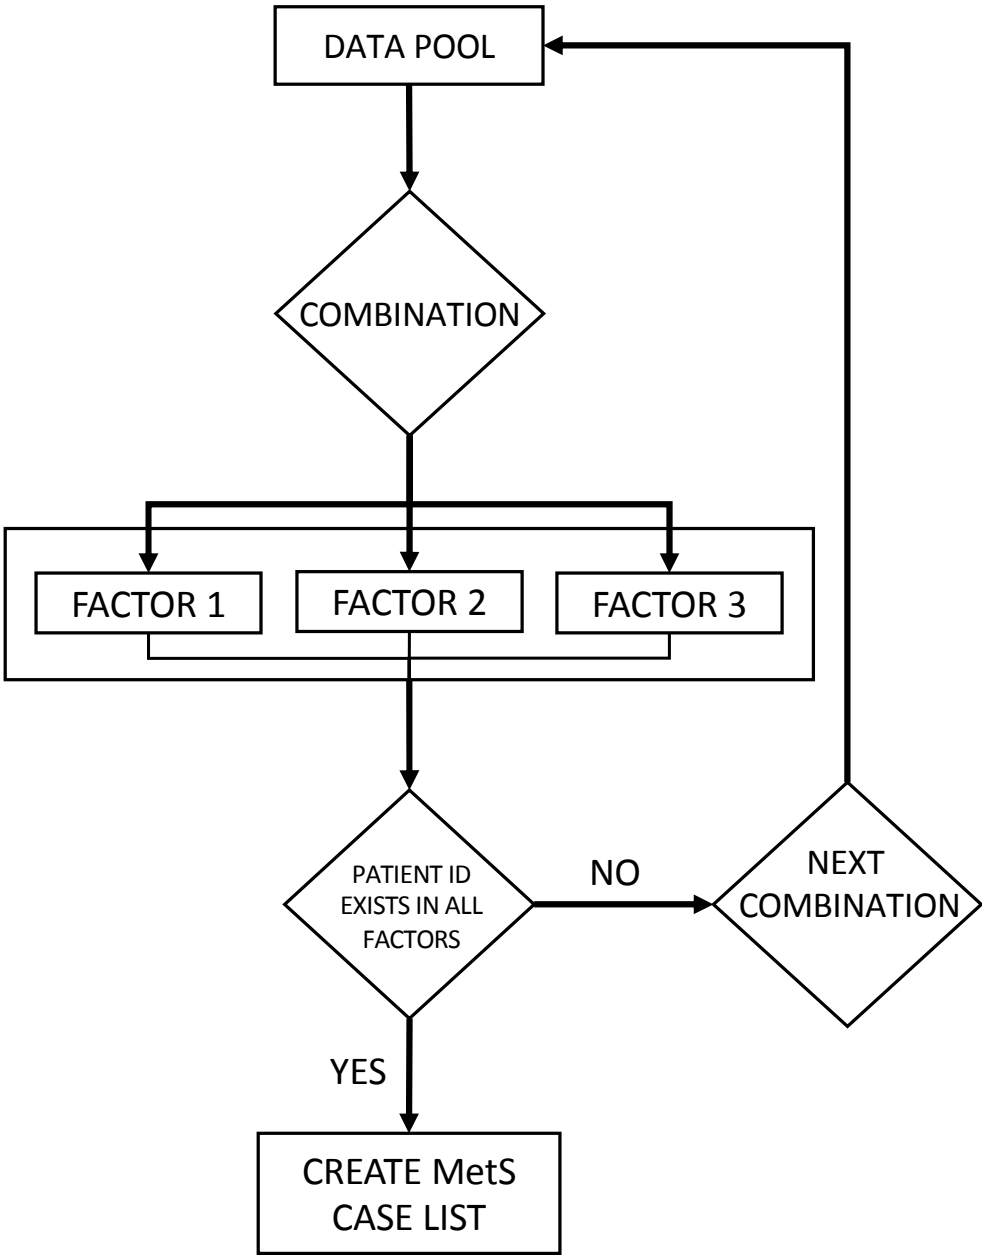

*Demonstrating the path of a single combination consisting of three MetS components. The combination is first created and separated based on its factors. Three lists of patients meeting the MetS criteria for each factor are created. The lists are combined based on Patient ID and those patients which exist in all three lists fulfill the requirement for a positive MetS case according to the defined combination and are added to a MetS case list. Figure created in collaboration with C. Oliva.*

**Figure 1.3** Risk factors and disease proportions in individuals with and without metabolic syndrome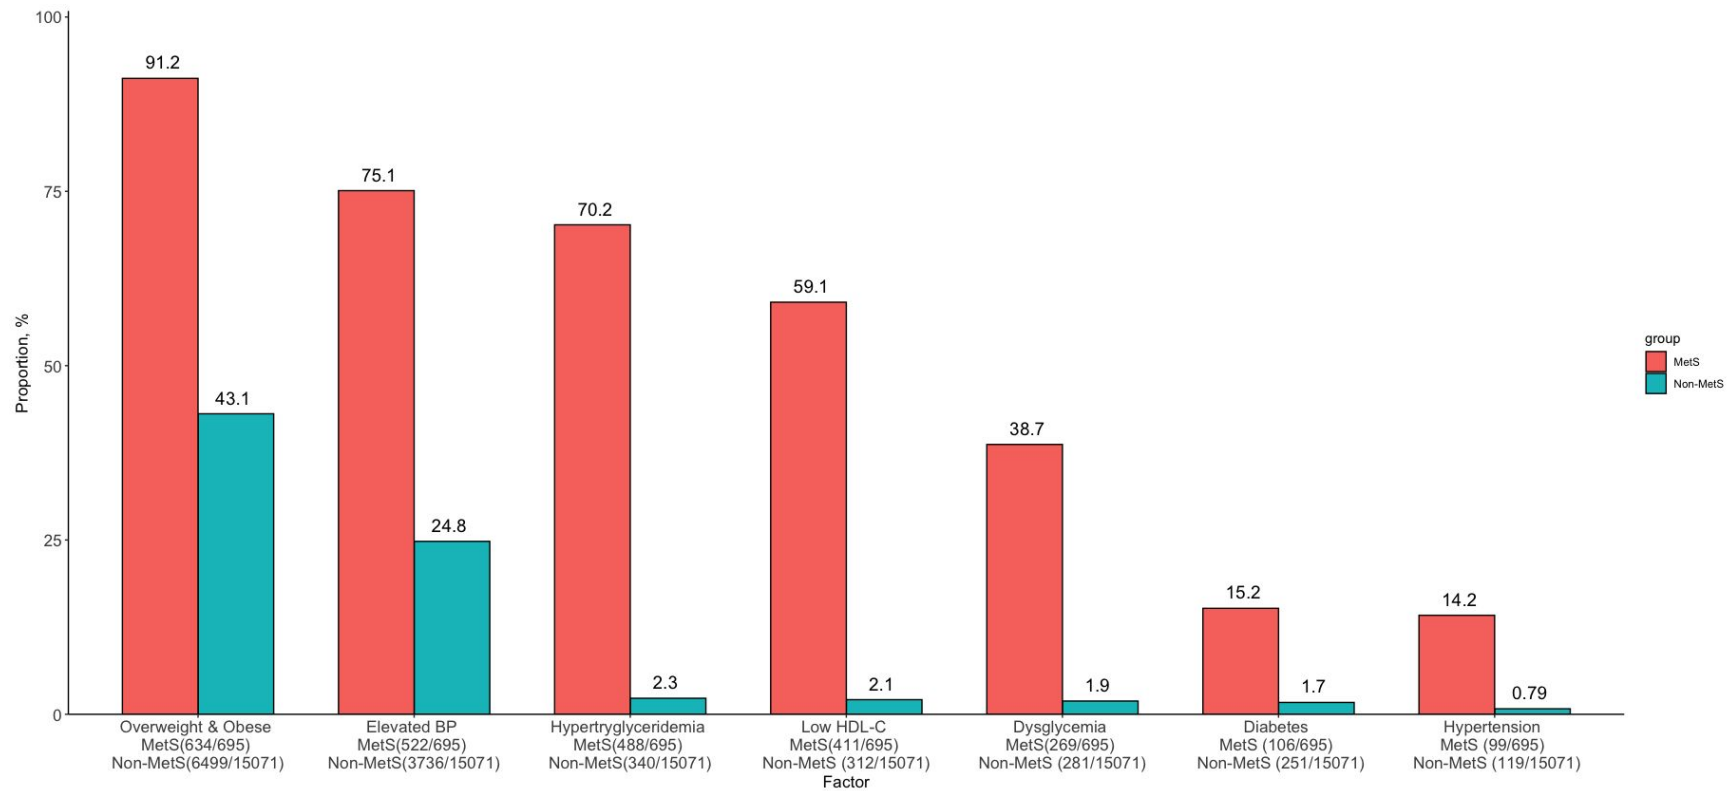

*Patients shown as proportion achieving MetS component cut points in individuals with and without MetS, numerically represented in parenthesis. Metabolic syndrome (MetS), blood pressure (BP), high density lipoprotein cholesterol (HDL-C).*

1  
2  
3  
4  
5  
6  
7  
8  
9  
10  
11  
12  
13  
14  
15  
16  
17  
18  
19  
20  
21  
22  
23  
24  
25  
26  
27  
28  
29  
30  
31  
32  
33  
34  
35  
36  
37  
38  
39  
40  
41  
42  
43  
44  
45  
46  
47

**Figure 1.4** Distributions of missing data in those with metabolic syndrome and those with a BMI  $\geq 25\text{kg/m}^2$

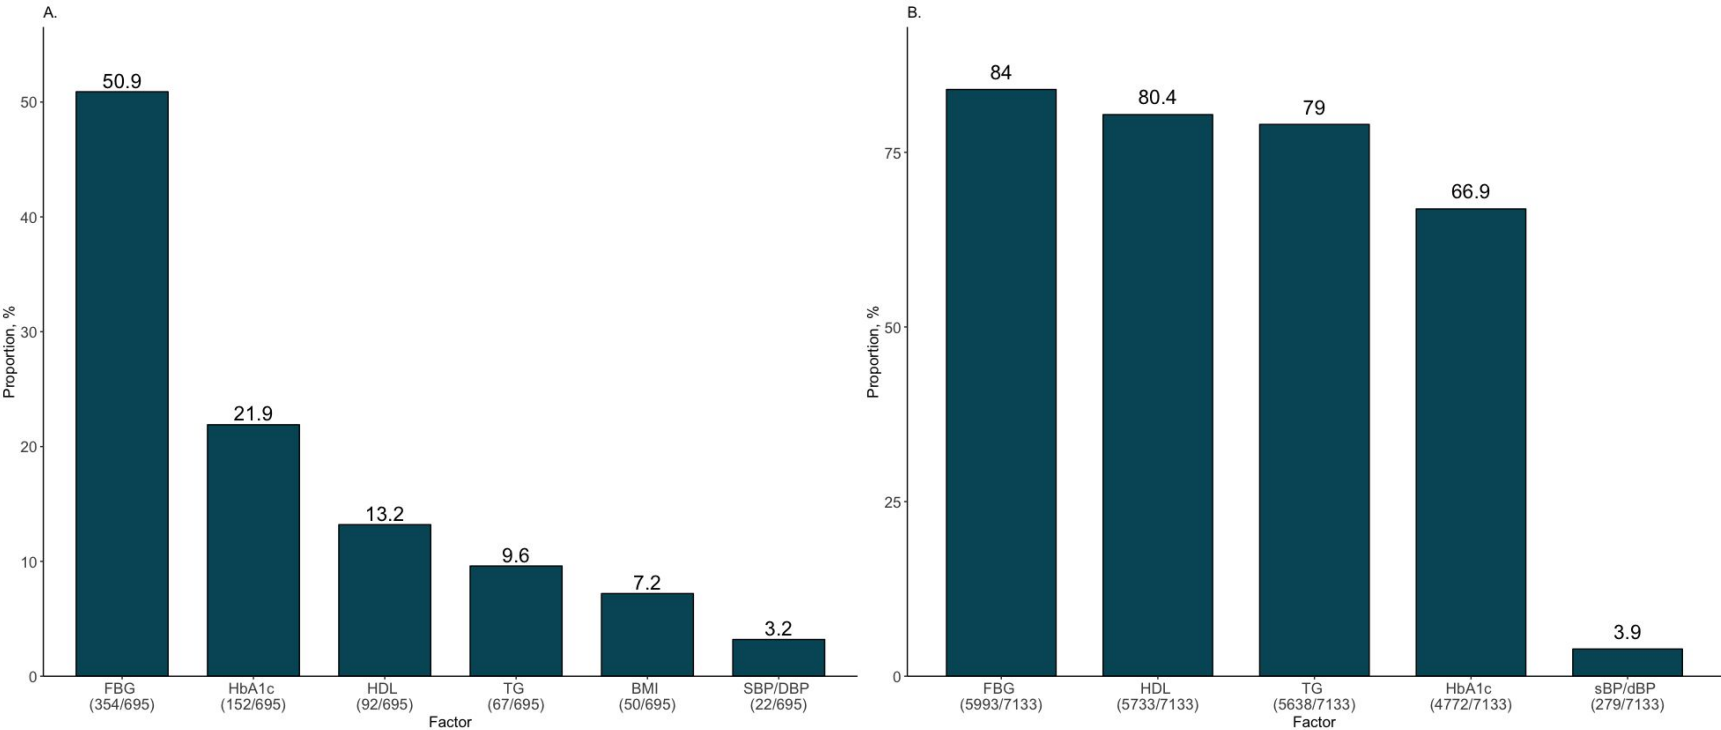

Data in parenthesis are the number of patients with MetS or who are overweight and obese. \*Body mass index (BMI), triglycerides, (TG), high density lipoprotein (HDL), fasting blood glucose (FBG), hemoglobin A1c (HbA1c), systolic/diastolic blood pressure (sBP/dBP).
